# Supplementary material
Source: PubMed Central journal article supplement (PMC2668077)
Supplement: mmc1.pdf [file mmc1.pdf]

## Supplemental Data

### A Missense Mutation in SLC33A1,

which Encodes the Acetyl-CoA Transporter,

### Causes Autosomal-Dominant Spastic Paraplegia (SPG42)

Pengfei Lin, Jianwei Li, Qiji Liu, Fei Mao, Jisheng Li, Rongfang Qiu, Huili Hu, Yang Song, Yang Yang, Guimin Gao, Chuanzhu Yan, Wanling Yang, Changshun Shao, and Yaoqin Gong

Table S1 Two-Point LOD Scores Showing Exclusion of Linkage to Known HSP Loci

| Candidate<br>Gene | Chr.         | Marker   | LOD Score<br>( $\theta = 0$ )* |
|-------------------|--------------|----------|--------------------------------|
| SPG3A             | 14q11-q21    | D14S589  | -7.273                         |
| SPG4              | 2p22-p21     | D2S2351  | -11.111                        |
|                   |              | D15S817  | -8.814                         |
| SPG6              | 15q11.1      | D15S128  | -8.990                         |
|                   |              | D15S210  | -9.291                         |
|                   |              | D15S646  | -8.990                         |
| SPG8              | 8q24.13      | D8S1179  | -13.115                        |
|                   |              | D12S390  | -16.464                        |
| SPG10             | 12q13        | D12S1691 | -16.990                        |
|                   |              | D12S298  | -16.405                        |
| SPG12             | 19q13        | D19S587  | -9.914                         |
|                   |              | D2S425   | -4.333                         |
| SPG13             | 2q33.1       | D2S2318  | -4.530                         |
|                   |              | D2S1384  | -4.781                         |
| SPG19             | 9q33-q34     | D9S934   | -13.352                        |
| SPG29             | 1p31.3-p21.1 | D1S1588  | -9.944                         |
| SPG31             | 2p11.2       | D2S428   | -3.222                         |
|                   |              | D2S2951  | -5.631                         |
| SPG33             | 10q24.2      | D10S677  | -5.893                         |

\* A disease allele frequency of 0.0001 and a penetrance of 90% were assumed for the disease locus.

Table S2. Linkage-Scan Results

| Chr.  | No. of Genotyped Markers | Intermarker Distance (cM) Range (Average) | Maximum LOD Score | No. of Markers with LOD Scores > -2 | Markers with Positive LOD Scores        |
|-------|--------------------------|-------------------------------------------|-------------------|-------------------------------------|-----------------------------------------|
| 1     | 16                       | 10.25-23.96 (18.1)                        | -3.437            | 0                                   |                                         |
| 2     | 18                       | 7.05-21.7 ( 15.0)                         | -3.148            | 0                                   |                                         |
| 3     | 14                       | 6.42-22.18 (16.3)                         | 3.569             | 2                                   | D3S1744:<br>3.569;<br>D3S3053:<br>0.797 |
| 4     | 13                       | 9.63-20.56 (16.3)                         | 1.605             | 1                                   | D4S2431:<br>1.605                       |
| 5     | 13                       | 9.09-22.35 (15.2)                         | -8.26             | 0                                   |                                         |
| 6     | 11                       | 8.53-22.35 (17.6)                         | 1.566             | 1                                   | D6S1959:<br>1.566                       |
| 7     | 11                       | 6.49-22.75 (16.5)                         | 0.362             | 1                                   | D7S517:<br>0.362                        |
| 8     | 11                       | 6.92-22.41 (15.3)                         | -6.907            | 0                                   |                                         |
| 9     | 10                       | 11.32-22.76 (16.9)                        | -3.365            | 0                                   |                                         |
| 10    | 11                       | 11.49-21.74 (15.7)                        | -3.419            | 0                                   |                                         |
| 11    | 8                        | 15.08-25.97 (18.5)                        | -7.248            | 0                                   |                                         |
| 12    | 10                       | 6.42-23.35 ( 17.6)                        | -3.192            | 0                                   |                                         |
| 13    | 7                        | 8.87-23.94 (16.3 )                        | -5.36             | 0                                   |                                         |
| 14    | 9                        | 10.18-21.37 (15.4)                        | -6.55             | 0                                   |                                         |
| 16    | 7                        | 12.9-22.65 ( 19.2)                        | -6.951            | 0                                   |                                         |
| 17    | 7                        | 12.55-23.52 ( 18.1)                       | -9.497            | 0                                   |                                         |
| 18    | 7                        | 12.81-23.24 ( 18.0)                       | -6.437            | 0                                   |                                         |
| 19    | 7                        | 7.48-22.53 ( 15.0 )                       | -6.054            | 0                                   |                                         |
| 20    | 6                        | 9.53-22.07 (16.9 )                        | 0.331             | 1                                   | D20S162:<br>0.331                       |
| 21    | 4                        | 13.05-17.28 (14.4)                        | -6.089            | 0                                   |                                         |
| 22    | 5                        | 4.06-16.49 ( 12.5)                        | -2.912            | 0                                   |                                         |
| Total | 205                      |                                           |                   | 6                                   |                                         |

Table S3. Primers Used for PCR Amplification of *SLC33A1* Exons

| Exon | Primer (5'→3')        |                       | Product<br>Size (bp) | Annealing<br>Temperature<br>(°C) |
|------|-----------------------|-----------------------|----------------------|----------------------------------|
|      | Forward               | Reverse               |                      |                                  |
| 1    | GTGCCCTTATCGCTCTGA    | GTGTTATTTGATGGGTTGC   | 1155                 | 55                               |
| 2    | CCTGCCTTTTTGGTTGTTGT  | TGGTAGTGGAAAGGGACCTG  | 818                  | 63                               |
| 3    | TGACTCATGGGGAGATACT   | AACTCAGCAGGACTACGAT   | 1176                 | 54                               |
| 4    | ATTGGTAGAAGAGGGAGTAC  | TTAAGACAACCTGTAGAAAGC | 615                  | 58                               |
| 5    | GTCACATCTTTGTATTGCTGG | ACGCCTTTAAGGGAAGTAG   | 954                  | 57                               |
| 6    | CACCCGTAATTCCAGCATT   | CACCCGTGACTACTGCATTG  | 976                  | 63                               |
